# Supplementary material
Source: publisher figshare collection journal article supplement (https://frontiersin.figshare.com/ndownloader/files/33157982)
Supplement: Supplementary file [file 33157982]

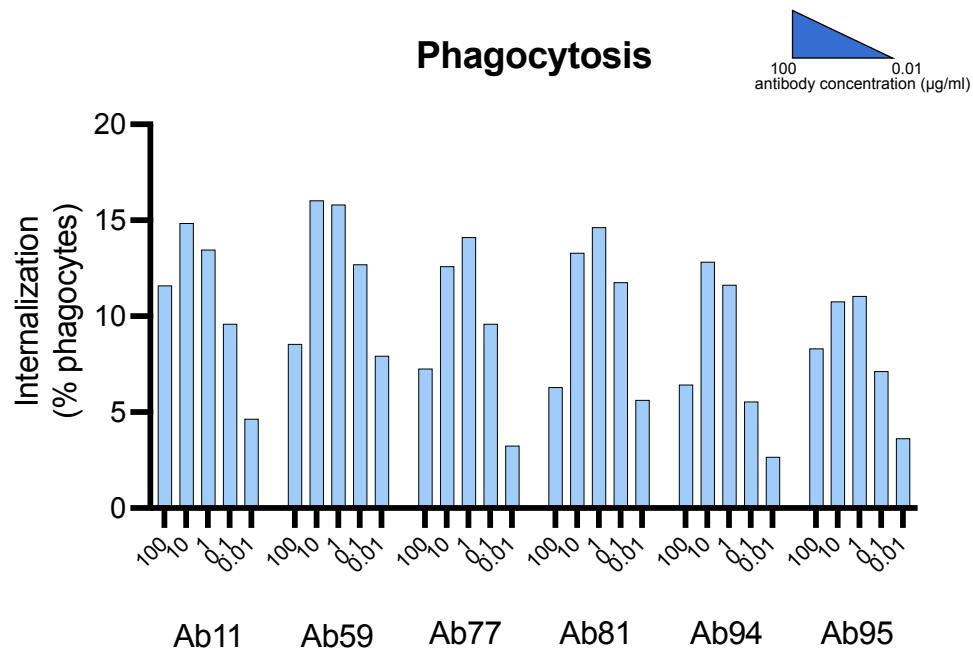

**Supplementary Figure 5. Internalization control for phagocytosis experiments.**

Spike beads were stained with the acid-sensitive dye pHrodo (FITC) and were then opsonized with dilutions of selected monoclonal antibodies. The cells were then analyzed by flow cytometry to determine the rate of bead internalization. A cell that was doubly fluorescent in APC and FITC has had internalized Spike-beads.
